# Supplementary material for: Homogenizing and Estimating the Uncertainty in NOAA’s Long Term Vertical Ozone Profile Records Measured with the Electrochemical Concentration Cell Ozonesonde
Source: Copernicus journal article supplement (doi:10.5194/amt-2017-397), 2017-12-04
Supplement: Supplementary file 1 [file amt-2017-397-supplement.pdf]

## Supplemental Material

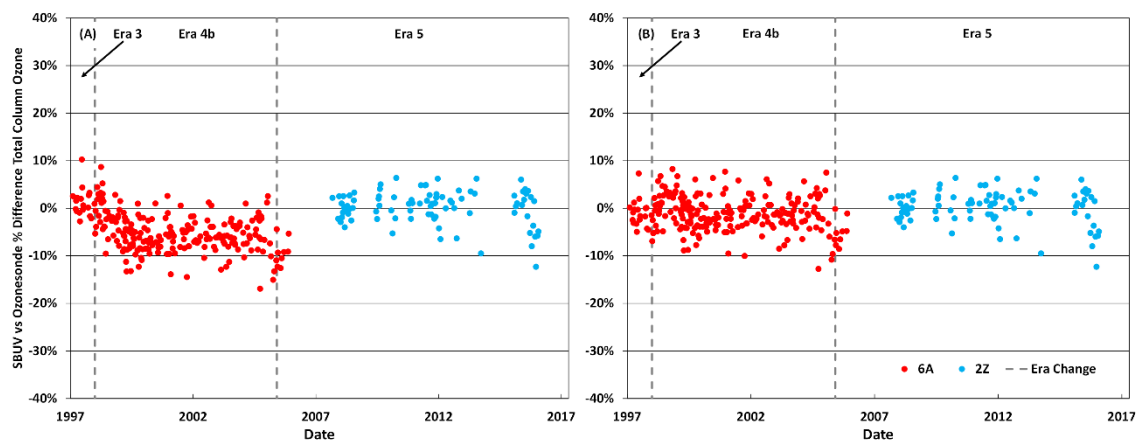

Figure S1: Suva, Fiji SBUV vs Ozone sonde total column ozone comparison before (A) and after (B) applying ozone sensor efficiency.

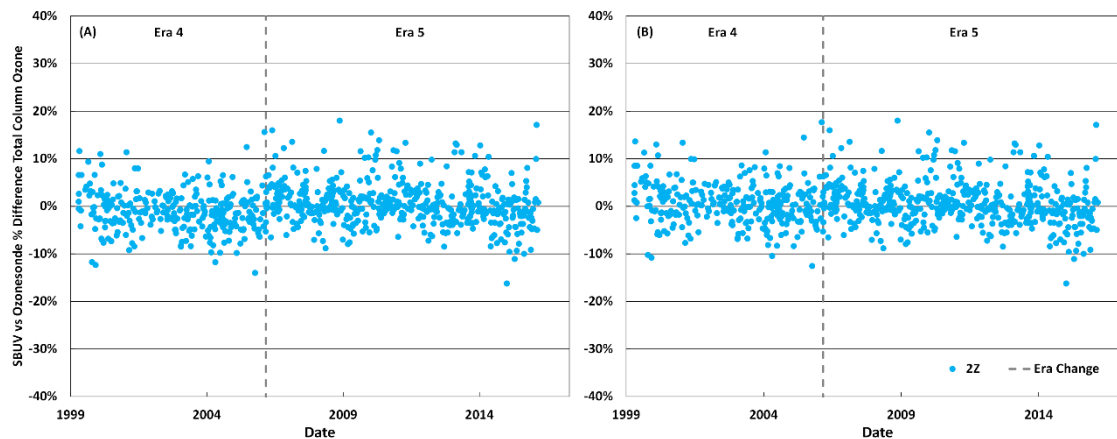

5 Figure S2: Huntsville, Alabama SBUV vs Ozone sonde total column ozone comparison before (A) and after (B) applying the ozone sensor efficiency.

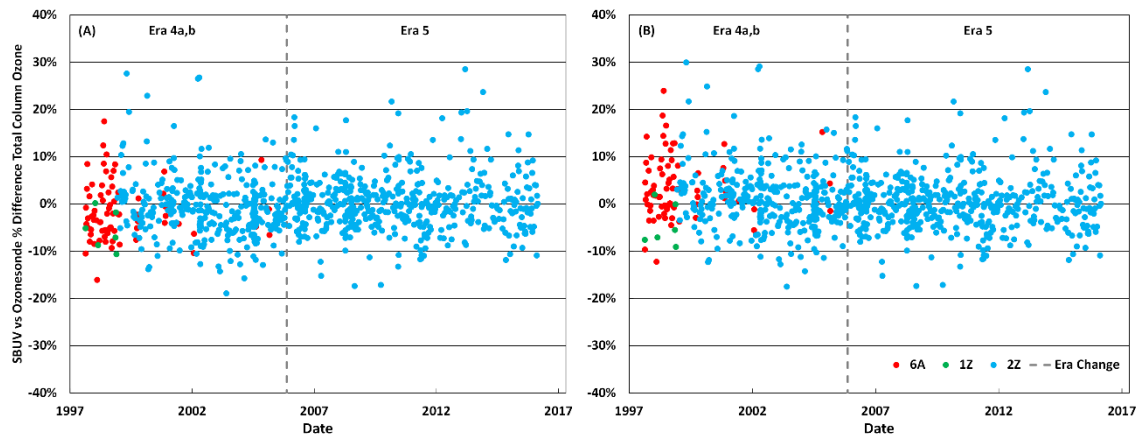

Figure S3: Trinidad Head, California SBUV vs Ozonesonde total column ozone comparison before (A) and after (B) applying the ozone sensor efficiency.

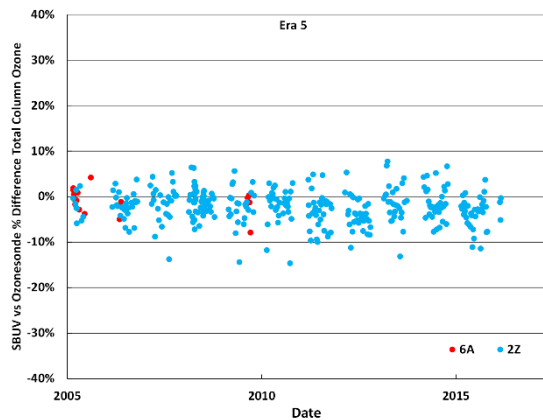

5 Figure S4: Summit, Greenland SBUV vs Ozonesonde total column ozone comparison after applying ozone sensor efficiency.

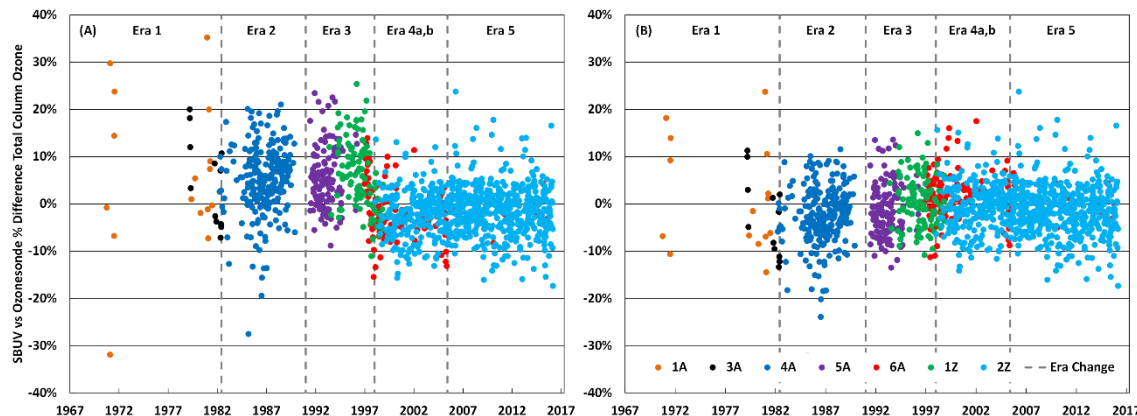

Figure S5: Boulder, CO Dobson vs Ozonesonde total column ozone comparison before (A) and after (B) applying ozone sensor efficiency.

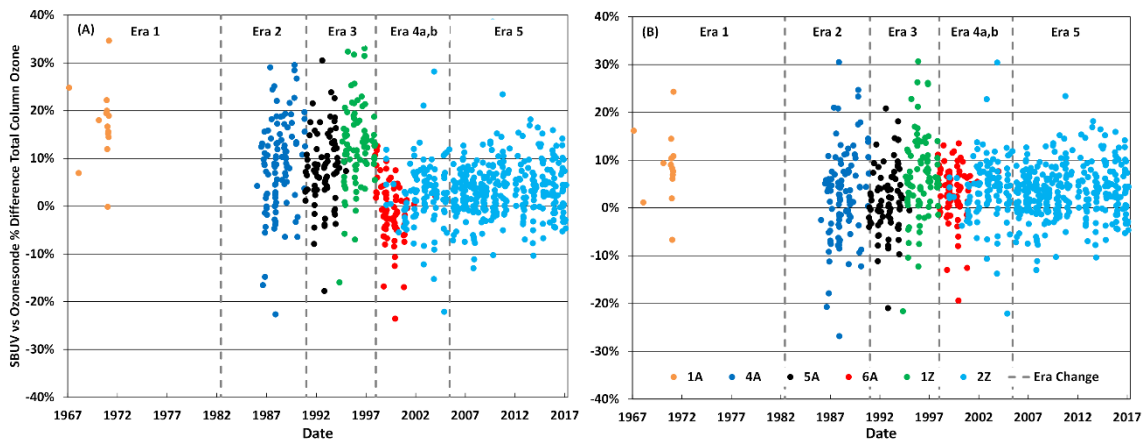

Figure S6: South Pole Dobson vs Ozone sonde total column ozone comparison before (A) and after (B) applying ozone sensor efficiency.

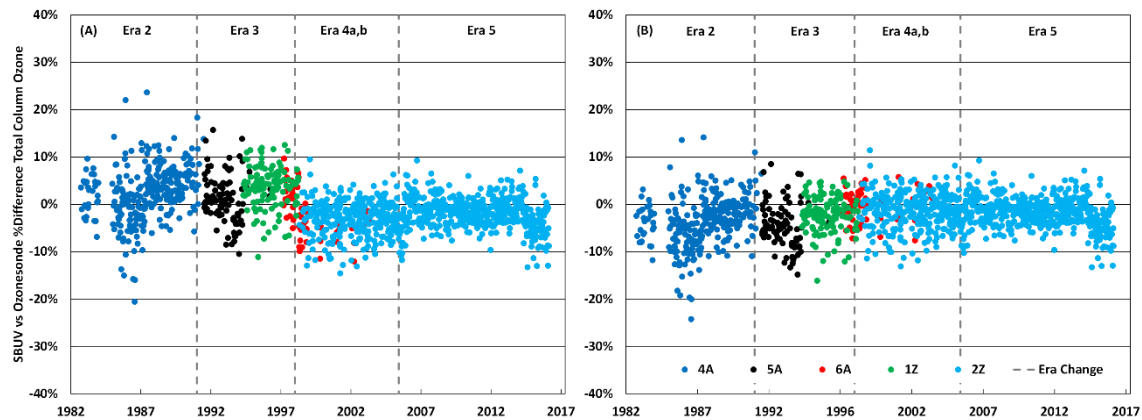

5 Figure S7: Hilo, HI Dobson vs Ozone sonde total column ozone comparison before (A) and after (B) applying ozone sensor efficiency.

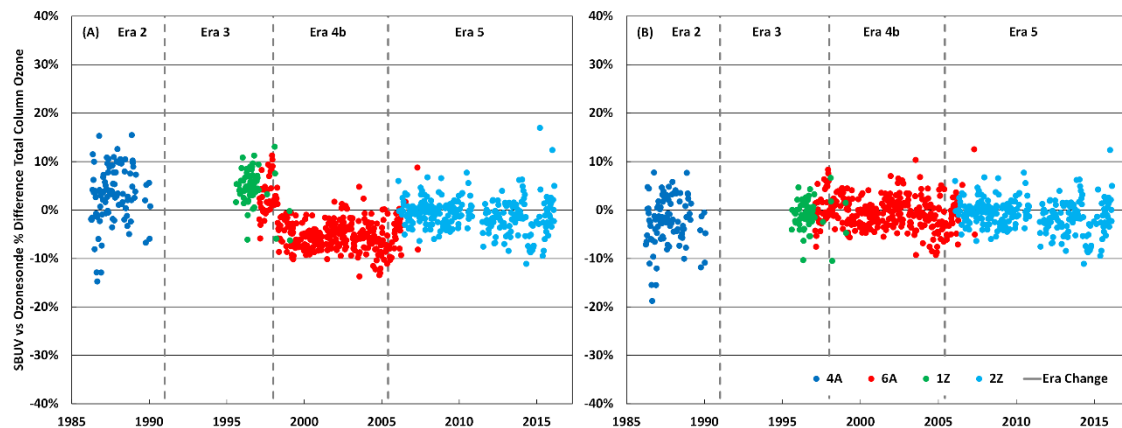

Figure S8: Pago Pago, American Samoa Dobson vs Ozone sonde total column ozone comparison before (A) and after (B) applying ozone sensor efficiency.
